# Supplementary material for: Histone deacetylase-4 is required during early cranial neural crest development for generation of the zebrafish palatal skeleton
Source: PubMed Central journal article supplement (PMC3426487; doi:10.1186/1471-213x-12-16), 2012-06-07

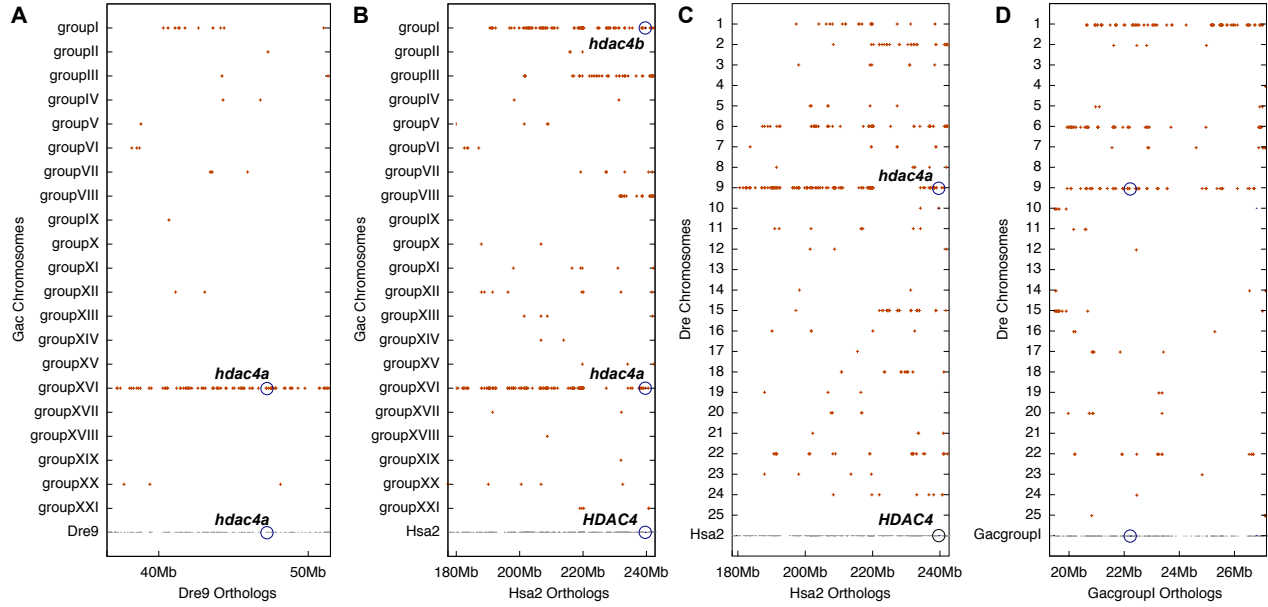

Supplement: 1471-213X-12-16-S3.pdf [file 1471-213X-12-16-S3.pdf]
